# Supplementary material for: Incorporation of a novel nucleobase allows stable oligonucleotide-directed triple helix formation at the target sequence containing a purine·pyrimidine interruption
Source: Royal Society of Chemistry journal article supplement (doi:10.1039/b103743a), 2001-01-01
Supplement: b103743a.doc [file b103743a.doc]

Supporting information

1.General.

Reagents were purchased from Aldrich or Lancaster and used without further purification. T- and C-phosphoramidites used in the syntheses of III, were from PE-Biosystems (Courtaboeuf, France). Standard oligonucleotides (OligoGold grade) were synthesized by Eurogentec (Seraing, Belgium) and were used after ethanol precipitation.

2.Synthesis.

Compound 4: A solution (15 ml) of ethyl 2-(2-deoxy-5-*O*-dimethoxytrityl-D-ribofuranosyl-1)-acetate (500 mg, 1 mmol) in 1,4-dioxane containing concentrated NaOH (4:1, v/v) was maintained for 2 h at 60°C. The solvent was evaporated and the residue coevaporated with toluene and dried overnight under vacuo in the presence of P2O5. To a solution of the resulting salt in dry methylene chloride (20 ml) were added successively: triethylamine (0.280 ml, 2 mmol), chloromethylpyridinium iodide (500 mg, 2 mmol) and the aniline derivative 2 (350 mg,1.5 mmol). After refluxing the solution for 1 h, the product of the reaction was extracted with methylene chloride. The organic phase was dried over MgSO4, filtered and evaporated. The residue was purified by silica gel chromatography using ethyl acetate/heptane/triethylamine (7/3/0.1) to give 490 mg of 4 (74%) as a white foam .

1H NMR (CDCl3, 250 MHz) :  1.85 (m, 1H, H-2'), 2.06 (m, 1H, H-2'), 2.11 (s, 3H, Ac.), 2.68 (m, 2H, CH2), 3.18 (m, 2H, H-5'), 3.70 and 3.71 (2s, 6H, OCH3), 4.10 (m, 1H, H-4'), 4.32 (m, 1H, H-3'), 4.66 (m, 1H, H-1'), 6.73 (d, 4H, *J* = 8.6 Hz, H-Ar), 6.95 (s, 1H, H-7), 7.13-7.35 (m, 8H, H-Ar), 7.45 (m, 5H, H-Ar), 8.10 (s, 1H, H-2), 9.06 (s, 1H, NH), 11.20 (s, 1H, NHAc). 13C NMR (CDCl3, 62.5 MHz) :  22.72, 40.83, 43.37, 54.96, 64.40, 73.21, 74.97, 85.91, 86.46, 107.62, 112.92, 117.59, 119.24, 121.38, 126.59, 127.62, 127.95, 128.89, 129.83, 129.90, 134.50, 135.75, 135.83, 138.50, 144.78, 149.00, 158.16, 158.25, 162.58, 168.81 and 169.50. FAB-MS *m/z* 716 (M+Na)+.

Phosphoramidite 5: To a solution of derivative 4 (300 mg, 0.43 mmol) in anhydrous methylene chloride (10 ml) was added dropwise: *N,N*-diisopropylethylamine (160 ml, 0.86 mmol) and 2-cyanoethyl diisopropylchlorophosphoramidite (112 ml, 0.5 mmol). After stiring the reaction mixture for 15 min at room temperature, the methylene chloride solution was washed with a saturated sodium hydrogenocarbonate solution and twice with water. The organic phase was dried over MgSO4, filtered and evaporated. The residue was purified by silica gel chromatography using ethyl acetate/heptane/triethylamine (1/9/0.1) to give 255 mg of phosphoramidite 5 (66%) as a white foam (two diastereoisomers).

31P NMR (243 MHz, CDCl3)  147.15, 146.71ESMS *m/z* 916 (M+Na)+.

3.Oligonucleotide synthesis.

Oligonucleotides were synthesized on a 1 mmol scale using a Biosystem 392 DNA/RNA synthesizer. Oligonucleotides were cleaved from the solid support and freed from their base labile protecting groups by treatment with concentrated amonia (30%) for 48h at room temperature to give the 5'-dimethoxytrityl (DMT) protected oligomers. The latter were purified by reversed-phase HPLC (Waters PrepPak Cartridge Delta-Pak C18, 15mm, 300A, 25x100mm) using a 30 min linear gradient of solvent A (0.1 M triethylammonium acetate buffer (pH 7) containing 7% of CH3CN) and solvent B (CH3CN) (100:0 to 60:40) at a flow rate of 5 ml/min. The DMT protecting group was cleaved by treatment with 80% aq. AcOH for 1 h at room temperature. The solution after being extracted twice with diethyl ether (20 ml) was evaporated. The oligomers were precipitated using an acetate buffer (pH 6.2) / EtOH solution and isolated after centrifugation at 0°C for 15 min.

4. Determination of melting temperatures.

Thermal denaturation studies were carried out on a Uvikon 940 spectrophotometer and interfaced to an IBM-AT computer for data collection and analysis. Temperature control of the cell holder was achieved by a Haake D8 circulating water bath. The temperature of the water bath was increased from 0 to 90°C and decreased back to 0°C at a rate of 0.15°C/min with absorption readings at 260, 295, 500 nm taken every 1°C. The maxima of the first derivatives of the melting curves gave a good approximation of the half-dissociation temperature (Tm) and allowed to characterize the stabilities of the complexes in a reproducible way. The DNA melting experiments were carried out in a 10 mM cacodylate buffer (pH 5.9) containing 100 mM NaCl, 10mM MgCl2 and 0.5 mM spermine.

**Figure**: UV absorbance at 260 nm vs. temperature (°C) profile of the oligonucleotide triplex I•IIxIII (containing an A•TxS triple) measured at pH 5.9 in a 10 mM cacodylate buffer containing 100mM sodium chloride, 10 mM magnesium chloride and 0.5 mM spermine.
